# Supplementary material for: Metabolic benefits of 17α-estradiol in liver are partially mediated by ERβ in male mice
Source: PubMed Central journal article supplement (PMC10276872; doi:10.1038/s41598-023-37007-1), 2023-06-17
Supplement: 41598_2023_37007_MOESM1_ESM.pdf [file 41598_2023_37007_MOESM1_ESM.pdf]

SUPPLEMENTARY FIGURES AND LEGENDS

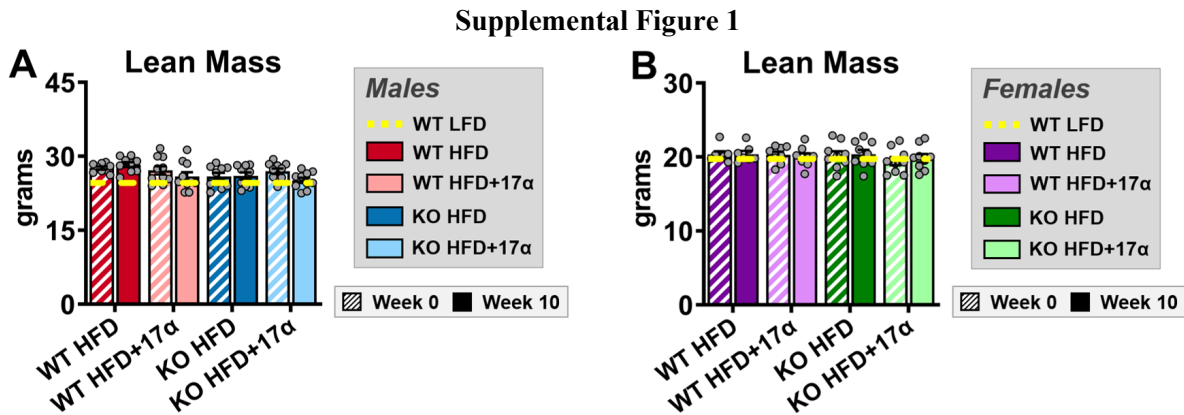

**Supplemental Figure 1. Neither ER $\beta$  ablation, nor 17 $\alpha$ -E2 treatment, affects lean mass in obese mice of either sex.** (A) Lean mass at baseline (week 0; striped) and week 10 (solid) in male WT and ER $\beta$ KO mice [n=9-10/group/timepoint]. (B) Lean mass at baseline (week 0; striped) and week 10 (solid) in female WT and ER $\beta$ KO mice [n=7-9/group/timepoint]. Age-matched, WT, LFD-fed mice were also evaluated as a normal-weight reference group and their corresponding means for both sexes are depicted as dashed yellow lines [n=9/group/timepoint]. All data are presented as mean  $\pm$  SEM and were analyzed within sex by two-way repeated measures ANOVA with Tukey post-hoc comparisons.

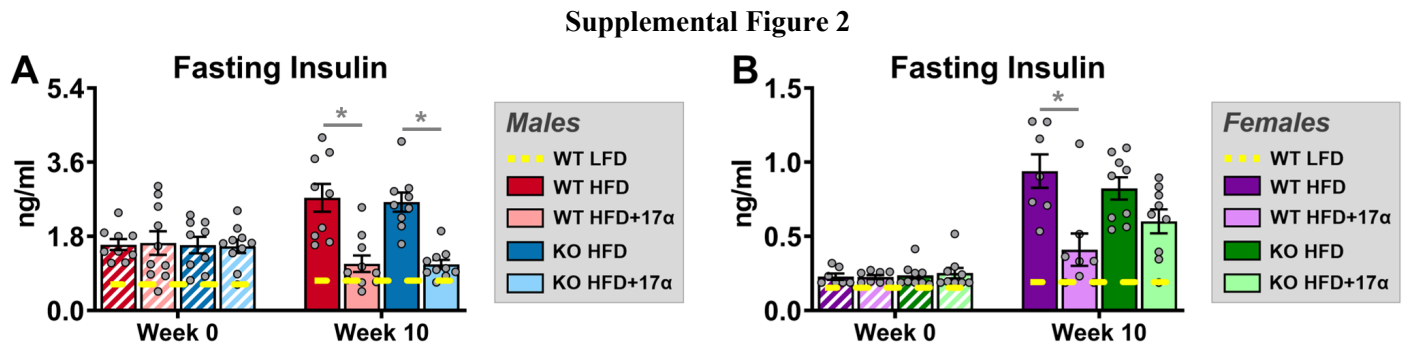

**Supplemental Figure 2. ER $\beta$  partially mediates 17 $\alpha$ -E2 effects on fasting insulin in obese female, but not male, mice.** (A) Fasting insulin at baseline (week 0; striped) and week 10 (solid) in male WT and ER $\beta$ KO mice [n=9-10/group/timepoint]. (B) Fasting insulin at baseline (week 0; striped) and week 10 (solid) in female WT and ER $\beta$ KO mice [n=7-9/group/timepoint]. Age-matched, WT, LFD-fed mice were also evaluated as a normal-weight reference group and their corresponding means for both sexes are depicted as dashed yellow lines [n=9/group/timepoint]. All data are presented as mean  $\pm$  SEM and were analyzed within sex by two-way repeated measures ANOVA with Tukey post-hoc comparisons. \* represents differences within genotypes across treatment groups at each timepoint. \*p < 0.05. We did not indicate statistical differences between week 0 and week 10 for purposes of visual clarity.

Supplemental Figure 3

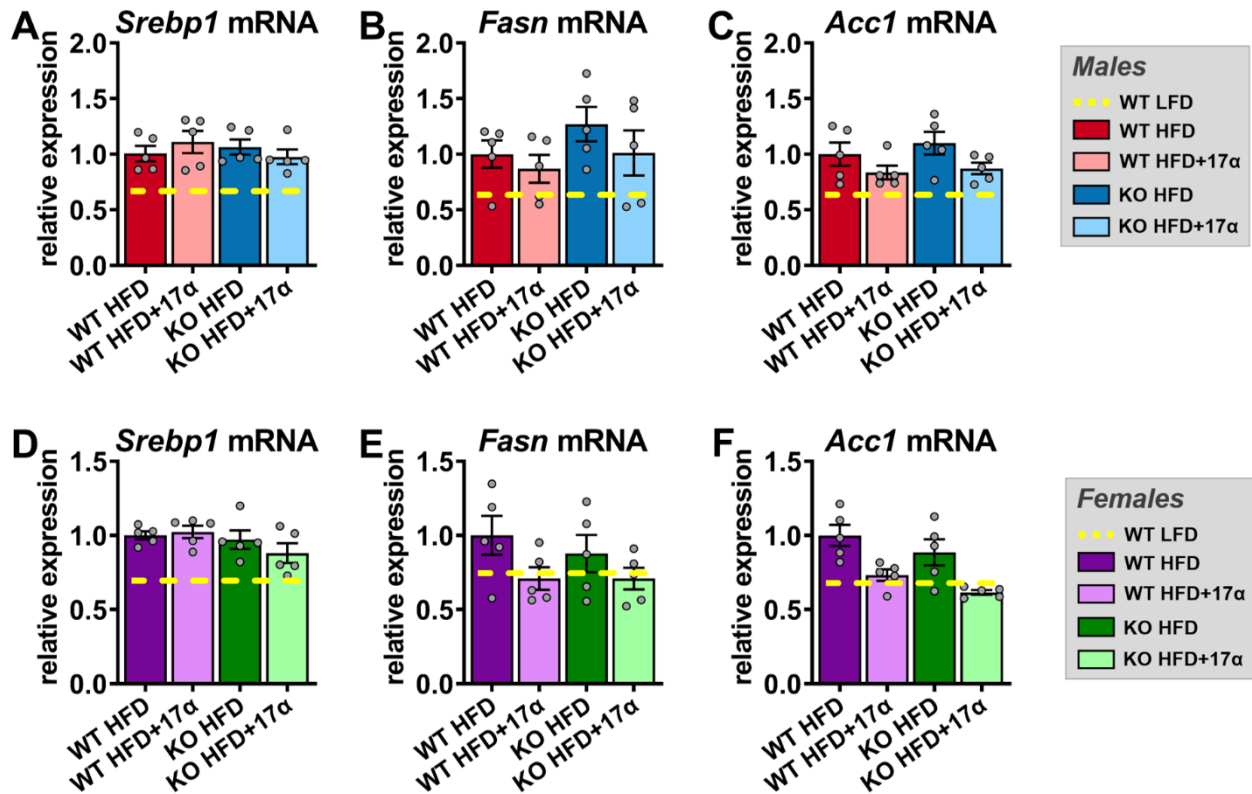

Supplemental Figure 3. Neither ER $\beta$  ablation, nor 17 $\alpha$ -E2 treatment, effects hepatic transcriptional markers of lipogenesis in obese mice of either sex. (A) *Srebp1* mRNA [n=5/group], (B) *Fasn* mRNA [n=5/group], and (C) *Acc1* mRNA [n=5/group] in liver from male WT and ER $\beta$ KO mice. (D) *Srebp1* mRNA [n=5/group], (E) *Fasn* mRNA [n=5/group], and (F) *Acc1* mRNA [n=5/group] in liver from female WT and ER $\beta$ KO mice. Age-matched, WT, LFD-fed mice were also evaluated as a normal-weight reference group and their corresponding means for both sexes are depicted as dashed yellow lines [n=5/group]. All data are presented as mean  $\pm$  SEM and were analyzed within sex by two-way ANOVA with Tukey post-hoc comparisons.

Supplemental Figure 4

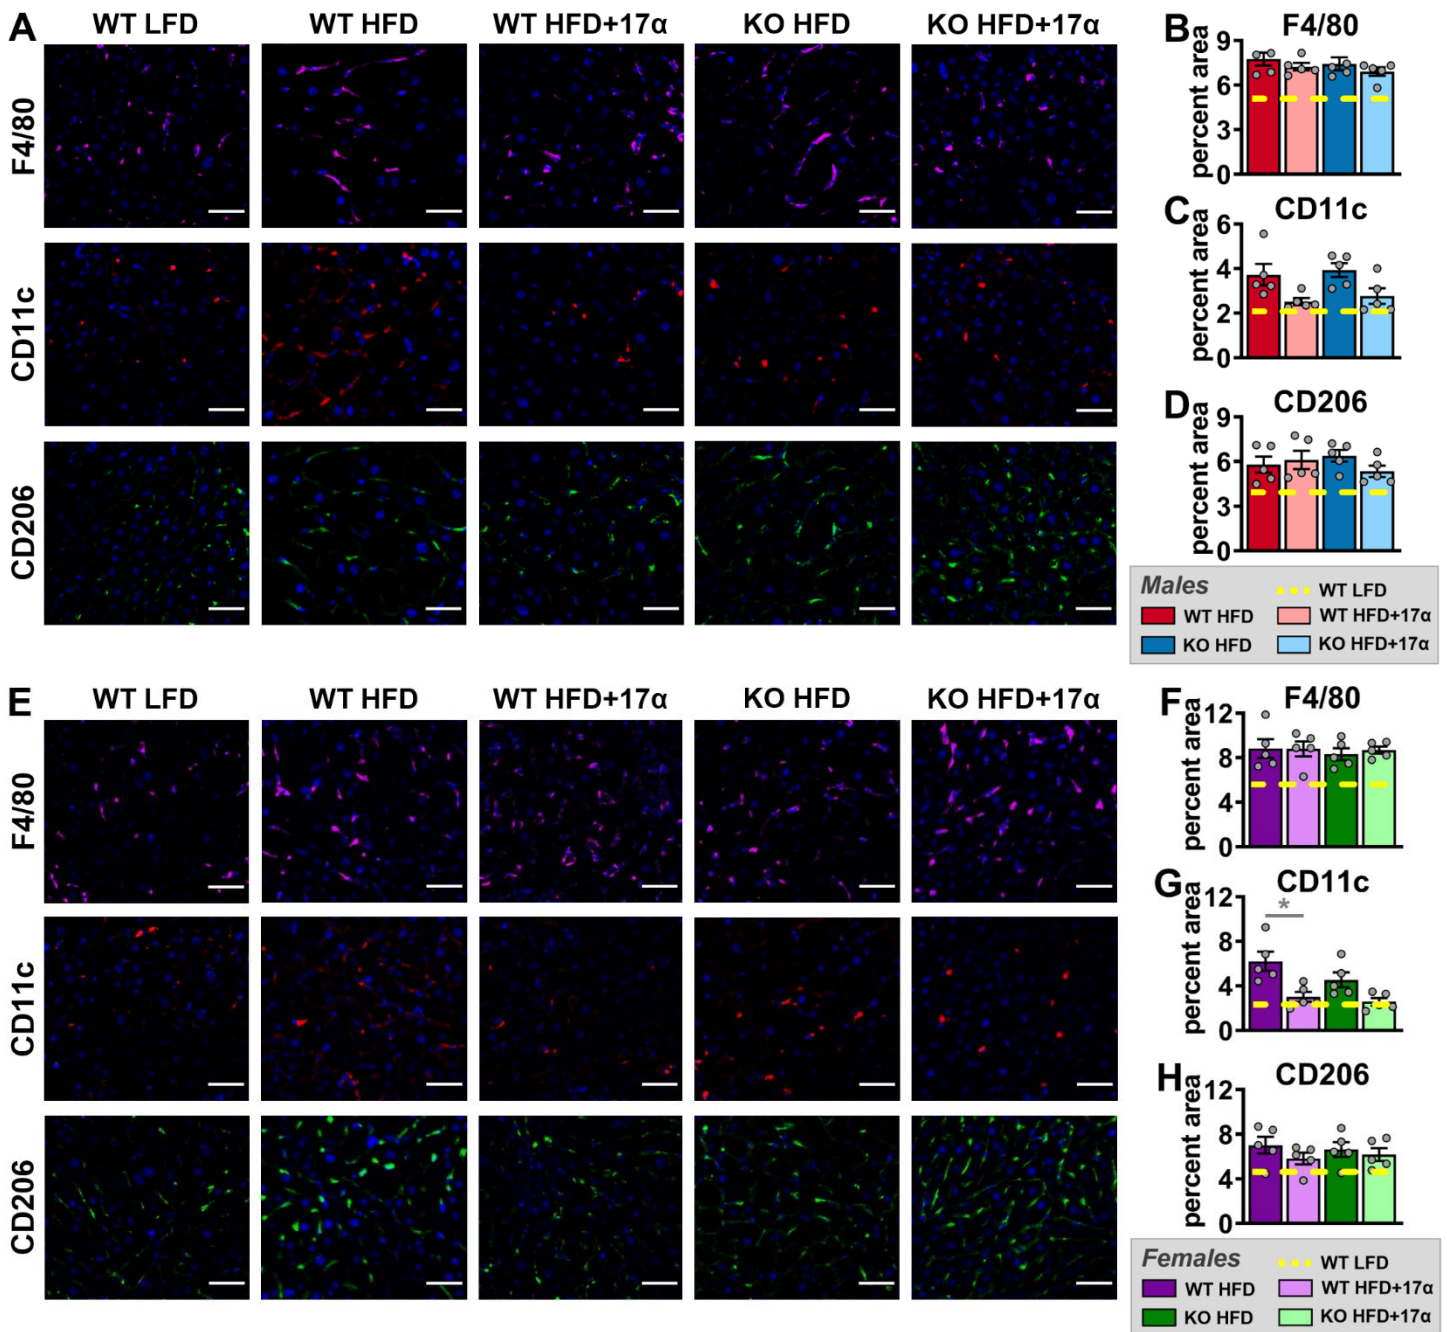

**Supplemental Figure 4. 17 $\alpha$ -E2 attenuates proinflammatory macrophage responses in female, but not male, mice in a ER $\beta$ -dependent manner.** (A) Representative immunofluorescence images of F4/80 (total macrophages), CD11c (M1, pro-inflammatory macrophages), and CD206 (M2, anti-inflammatory macrophages) in liver from male WT and ER $\beta$ KO mice (magnification = 320X; scale bar = 50  $\mu$ m). (B) Percent area for F4/80 [n=5/group], (C) Percent area for CD11c [n=5/group], and (D) Percent area for CD206 [n=5/group] in liver from male WT and ER $\beta$ KO mice. (E) Representative immunofluorescence images of F4/80 (total macrophages), CD11c (M1, pro-inflammatory macrophages), and CD206 (M2, anti-inflammatory macrophages) in liver from female WT and ER $\beta$ KO mice (magnification = 320X; scale bar = 50  $\mu$ m). (F) Percent area for F4/80 [n=5/group], (G) Percent area for CD11c [n=5/group], and (H) Percent area for CD206 [n=5/group] in liver from female WT and ER $\beta$ KO mice. Age-matched, WT, LFD-fed mice were also evaluated as a normal-weight reference group and their corresponding means for both sexes are depicted as dashed yellow lines [n=5/group]. All data are presented as mean  $\pm$  SEM and were analyzed within sex by two-way ANOVA with Tukey post-hoc comparisons. \* represents differences within genotypes across treatment groups. \*p < 0.05.

Supplemental Figure 5

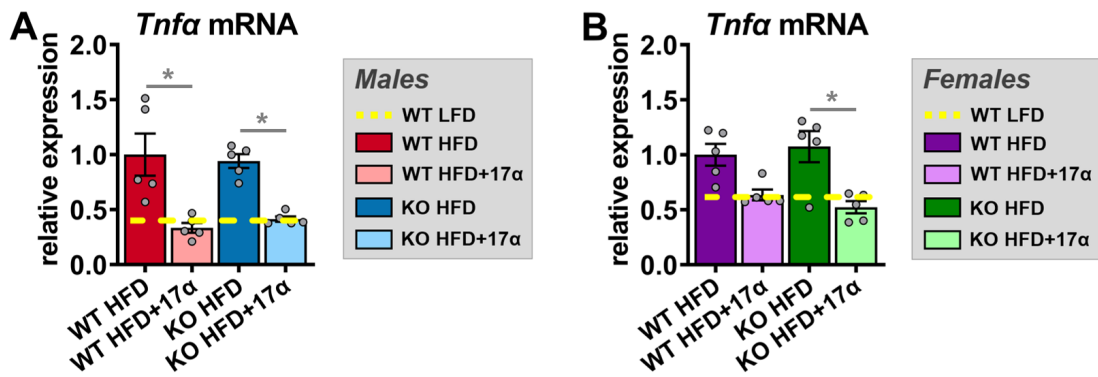

**Supplemental Figure 5. 17 $\alpha$ -E2 suppresses hepatic tumor necrosis factor  $\alpha$  transcripts in both sexes in an ER $\beta$ -independent manner.** (A) *TNF $\alpha$*  mRNA in liver from male WT and ER $\beta$ KO mice [n=5/group]. (B) *TNF $\alpha$*  mRNA in liver from female WT and ER $\beta$ KO mice [n=5/group]. Age-matched, WT, LFD-fed mice were also evaluated as a normal-weight reference group and their corresponding means for both sexes are depicted as dashed yellow lines [n=5/group]. All data are presented as mean  $\pm$  SEM and were analyzed within sex by two-way ANOVA with Tukey post-hoc comparisons. \* represents differences within genotypes across treatment groups. \*p < 0.05.
